# Supplementary material
Source: PubMed Central journal article supplement (PMC4227917)
Supplement: NIHMS633429-supplement-Supplemental_Data.pdf [file NIHMS633429-supplement-Supplemental_Data.pdf]

## Supplementary Online Content

Agrawal PB, Joshi M, Marinakis NS, et al. Expanding the phenotype associated with the *NEFL* mutation: neuromuscular disease in a family with overlapping myopathic and neurogenic findings. Published online September 29, 2014. *JAMA Neurol*. doi:10.1001/jamaneurol.2014.1432

**eTable.** Nerve Conduction Velocities.

This supplementary material has been provided by the authors to give readers additional information about their work.

**eTable. Nerve conduction velocities.**

| <b>MOTOR</b>        |                           |         | <b>Amplitude</b> | <b>Conduction Velocity</b> | <b>Distal Latency</b> |
|---------------------|---------------------------|---------|------------------|----------------------------|-----------------------|
| Stimulate           | Record                    |         | Milivolts (mv)   | Meter/sec                  | Milliseconds          |
| L-Peroneal          | Extensor digitorum brevis | Knee    | 5.5              | 48                         | 5.0                   |
|                     |                           | Ankle   | 5.5              |                            |                       |
|                     |                           | F-waves |                  |                            |                       |
| L- Posterior Tibial | Abductor hallucis         | Knee    | 4.0              | 49                         | 48.0                  |
|                     |                           | Ankle   | 4.5              |                            |                       |
|                     |                           | F-waves |                  |                            |                       |
| L--Median           | Abductor pollicis brevis  | Elbow   | 7.0              | 54                         | 4.5                   |
|                     |                           | Wrist   | 7.0              |                            |                       |
|                     |                           | F-waves |                  |                            |                       |
| L--Ulnar            | Abductor digiti minimi    | Elbow   | 13.0             | 53                         | 3.0                   |
|                     |                           | Wrist   | 13.0             |                            |                       |
|                     |                           | F-waves |                  |                            |                       |
| R--Median           | Abductor pollicis brevis  | Wrist   | 11.0             |                            | 4.3                   |

  

| <b>SENSORY</b> |                   |  | <b>Amplitude</b> | <b>Conduction Velocity</b> | <b>Distal Latency</b> |
|----------------|-------------------|--|------------------|----------------------------|-----------------------|
| Stimulate      | Record            |  | Milivolts (mv)   | Meter/sec                  | Milliseconds          |
| L--Sural       | Lateral malleolus |  | 16.0             | 57                         | 4.0                   |
| L--Median      | Index             |  | 16.0             |                            | 3.6                   |
|                | Middle            |  | 20.0             |                            | 3.6                   |
| L--Ulnar       | V                 |  | 20.0             |                            | 3.0                   |
| L--Radial      | Dorsal Hand       |  | 26.0             |                            | 2.5                   |
| R--Median      | Index             |  | 20.0             |                            | 3.9                   |
|                | Middle            |  | 20.0             |                            | 3.9                   |
